# Supplementary material for: Dynamics of morphogen source formation in a growing tissue
Source: PubMed Central journal article supplement (PMC11501038; doi:10.1371/journal.pcbi.1012508), 2024-10-14
Supplement: pcbi.1012508.s001.pdf [file pcbi.1012508.s001.pdf]

**Figure S1**

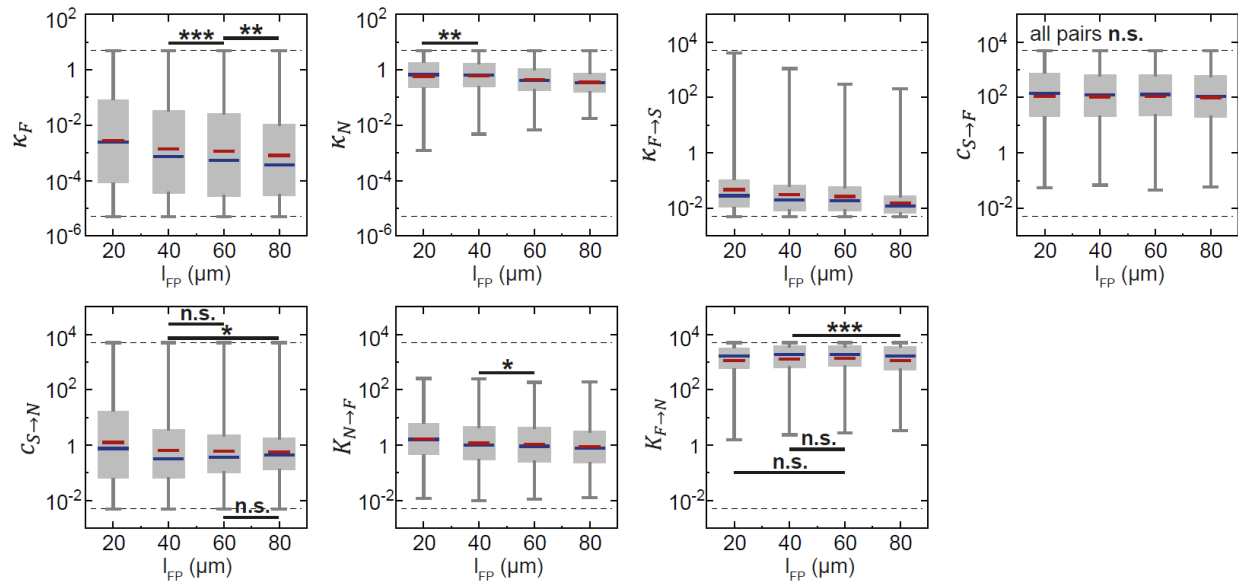

**Figure S1. Dependence of FP size on model parameters.** Distribution of model parameters for networks that yield the indicated final FP sizes at the end of the simulation ( $L_{end} = 400 \mu\text{m}$  at  $t = 60 \text{ h}$ ). The boundaries of the allowed range of parameters in the screen are indicated with dashed lines. Box-whisker plots: 25–75 percentile (box), median (blue line), mean (red line), highest/lowest observation (fence). Pairwise comparisons two-tailed  $t$ -test: ns, not significant,  $P > 0.05$ ; \*  $0.05 \geq P > 0.01$ ; \*\*  $0.01 \geq P > 0.001$ ; \*\*\*  $0.001 \geq P > 0.0001$ ; \*\*\*\*  $0.0001 \leq P$ . All pairwise comparisons that are not indicated are \*\*\*\*. Sample sizes (number of solutions for given  $l_{FP}$ ):  $20 \mu\text{m}$  ( $n = 23116$ ),  $40 \mu\text{m}$  ( $n = 12832$ ),  $60 \mu\text{m}$  ( $n = 5254$ ),  $80 \mu\text{m}$  ( $n = 1772$ ).
