# Supplementary material for: Dynamics of morphogen source formation in a growing tissue
Source: PubMed Central journal article supplement (PMC11501038; doi:10.1371/journal.pcbi.1012508), 2024-10-14
Supplement: pcbi.1012508.s002.pdf [file pcbi.1012508.s002.pdf]

**Figure S2**

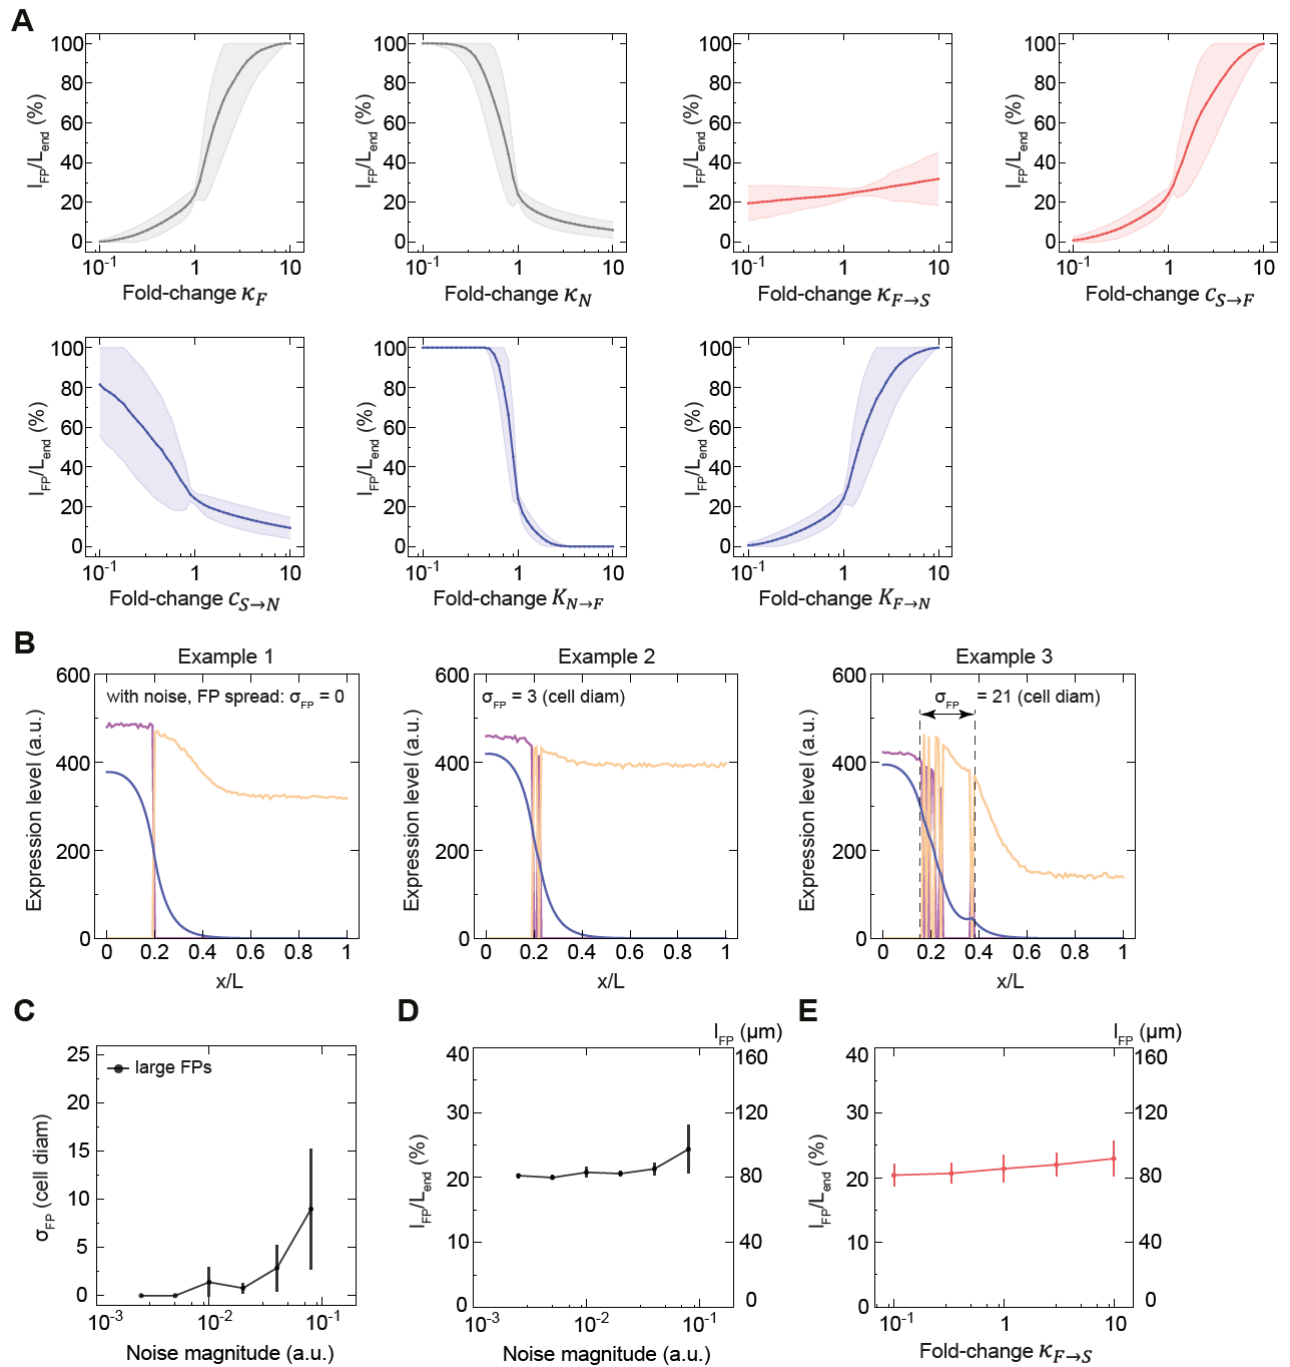

**Figure S2. Model results are robust to changes in diffusion and noise in gene expression. A.** Sensitivity to parameters (analogous to Fig 2) of the model with increased diffusion of Shh,  $D_S = 0.22 \mu\text{m}^2 \text{s}^{-1}$ . Mean relative FP size at  $t = 60$  h upon perturbation of the indicated model parameter for a subset of 214 randomly selected networks with large FPs ( $l_{FP}/L_{end} = 20\%$ ). Parameters are modified in 40 equally distributed logarithmic steps from 0.1 to 10-fold of their value. Shaded regions, SE. **B.** Three examples of gene expression pattern at  $t = 60$  h in simulations with noise (Methods). Parameters sets for large FPs are shown. The noise magnitude is  $\sigma_{[F]} = \sigma_{[N]} = 0.04$  a. u., and correlation time  $\tau_{[F]} = \tau_{[N]} = 50$  s. The FP spread  $\sigma_{FP}$  is defined as a difference between the lowest position of N and the highest position of F in relative units,  $x/L$ . The tissue is simulated with 100 bins, with one bin, corresponding to  $\sigma_{FP} = 0.01$  and one cell diameter. For the selected magnitude of noise, most insensitive solutions exhibit no change in boundary imprecision with  $\sigma_{FP} = 0$  (60% of solutions, example 1), moderate change  $\sigma_{FP} \leq 0.05$  (20%, example 2, consistent with (Zagorski et al., 2017, [18] in main text)), and large change  $0.05 < \sigma_{FP} \leq 0.25$  (10%, example 3). We exclude cases with  $\sigma_{FP} > 0.5$  (10%). The

mean ( $\pm$  SEM) FP spread is  $\sigma_{FP} = 0.03 \pm 0.02$ . The FP size  $l_{FP}^{noise}$  defined as the mid position between the lowest position of N and the highest position of F is  $l_{FP}^{noise} = 0.21 \pm 0.01$  (mean  $\pm$  SEM),  $n = 10$ . **C.** FP spread  $\sigma_{FP}$  for varied gene expression noise. The noise is varied from  $\sigma_{[F]} = \sigma_{[N]} = 0.0025$  a.u., by doubling the magnitude, up to  $\sigma_{[F]} = \sigma_{[N]} = 0.08$  a. u. Error bars SEM,  $n = 10$ . **D.** Relative FP size for varied noise. Noise up to  $\sigma_{[F]} = \sigma_{[N]} = 0.04$  a.u. only weakly affects the results. Error bars SEM,  $n = 10$ . **E.** Change in mean FP size for fixed noise  $\sigma_{[F]} = \sigma_{[N]} = 0.04$  a.u. and varied  $\kappa_{F \rightarrow S}$ . The FP size follows the same trend as in A (fold change of  $\kappa_{F \rightarrow S}$ ) indicating that noise does not affect the insensitivity of FP size to Shh production in the FP. Error bars SE,  $n = 10$ .
