# Supplementary material for: Dynamics of morphogen source formation in a growing tissue
Source: PubMed Central journal article supplement (PMC11501038; doi:10.1371/journal.pcbi.1012508), 2024-10-14
Supplement: pcbi.1012508.s003.pdf [file pcbi.1012508.s003.pdf]

**Figure S3**

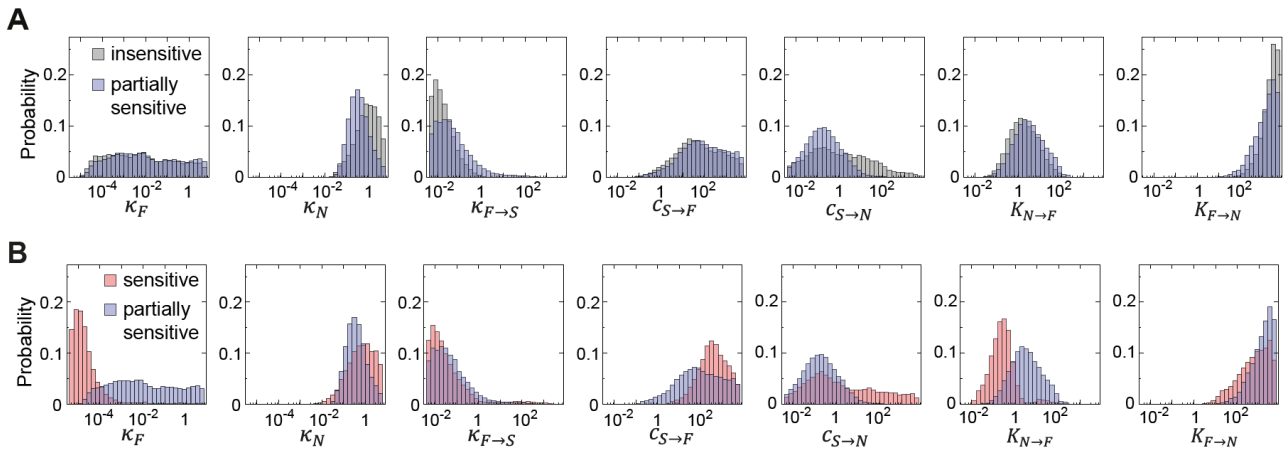

**Figure S3. Model parameters for different mechanisms of FP formation. A.** Distribution of model parameters for Shh<sup>FP</sup>-partially sensitive (blue) and insensitive (grey) solutions. In insensitive solutions the FP size does not change when Shh<sup>FP</sup> is removed ( $\kappa_{F \rightarrow S} = 0$ ), whereas in partially sensitive solutions the FP size is decreased when Shh<sup>FP</sup> is removed. **B.** The same as A, but for Shh<sup>FP</sup>-sensitive (red) and partially sensitive (blue) solutions. For sensitive solutions, the FP is completely lost when Shh<sup>FP</sup> is removed. A, B, insensitive (n = 66 827), partially sensitive (n = 55 911), sensitive (n = 45 336).
