# Supplementary material for: Dynamics of morphogen source formation in a growing tissue
Source: PubMed Central journal article supplement (PMC11501038; doi:10.1371/journal.pcbi.1012508), 2024-10-14
Supplement: pcbi.1012508.s004.pdf [file pcbi.1012508.s004.pdf]

**Figure S4**

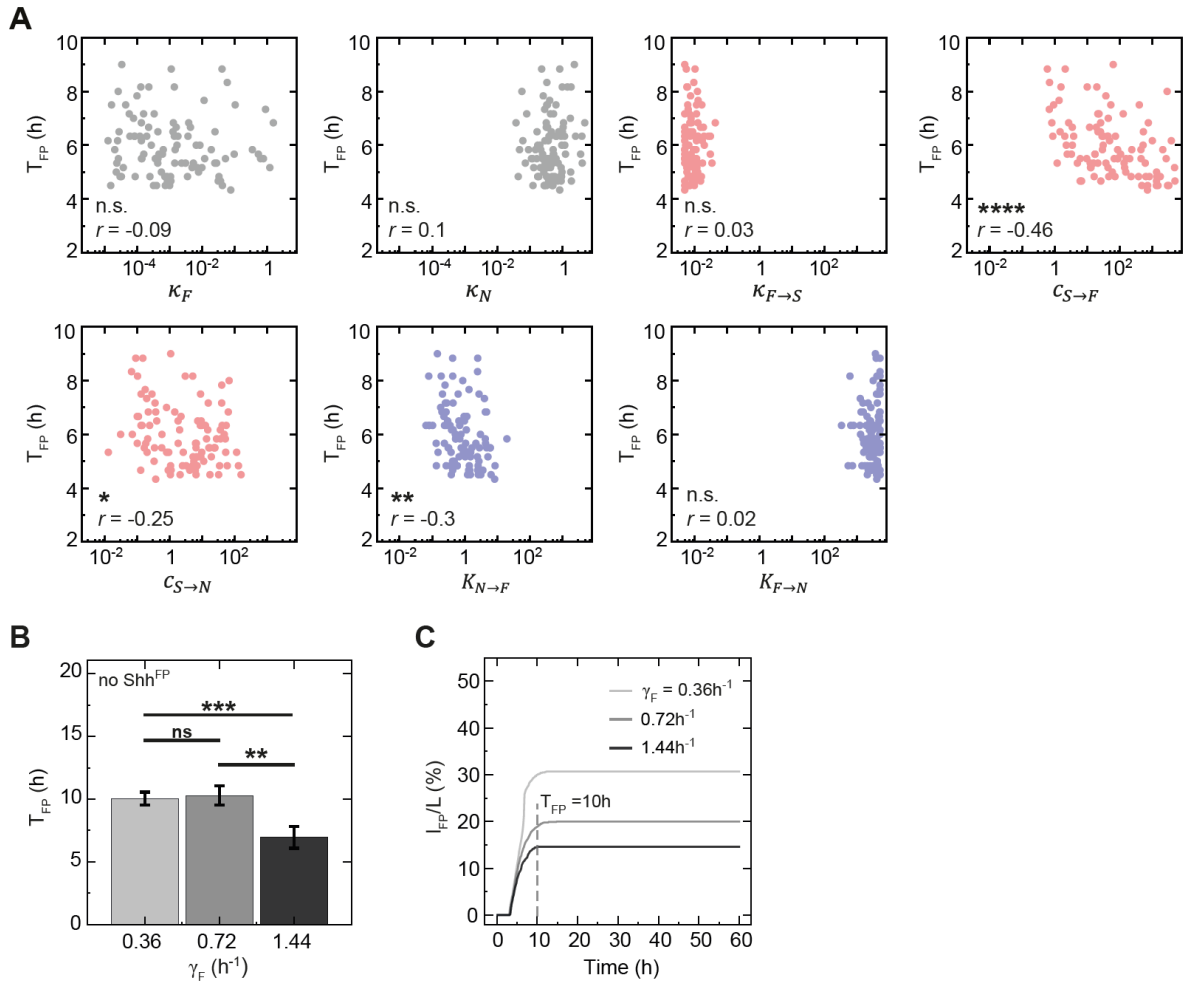

**Figure S4. Dependence of FP formation time on model parameters. A.** FP formation time  $T_{FP}$  for insensitive solutions upon perturbation of model parameters.  $T_{FP}$  is the time at which the FP reaches its final relative FP size. Pearson's correlation coefficient  $r$  between  $T_{FP}$  and log of parameter is reported. Pearson correlation test  $P$ -values: ns, not significant,  $P > 0.05$ ; \*  $0.05 \geq P > 0.01$ ; \*\*  $0.01 \geq P > 0.001$ ; \*\*\*  $0.001 \geq P > 0.0001$ ; \*\*\*\*  $0.0001 \leq P$ .  $n = 100$  solutions per parameter. **B.** Mean  $T_{FP}$  as a function of the degradation rate of F ( $\gamma_F$ ), see Eq. 1. Pairwise comparisons two-tailed  $t$ -test, significance levels as in A.  $n = 10$  per condition, error bars SEM. **C.** Relative FP size as a function of time for different  $\gamma_F$ . The default condition is  $\gamma_F = 0.72 h^{-1}$ , dashed line indicates the position of the average  $T_{FP} = 10$  h for that condition.
