# Supplementary material for: Dynamics of morphogen source formation in a growing tissue
Source: PubMed Central journal article supplement (PMC11501038; doi:10.1371/journal.pcbi.1012508), 2024-10-14
Supplement: pcbi.1012508.s005.pdf [file pcbi.1012508.s005.pdf]

**Figure S5**

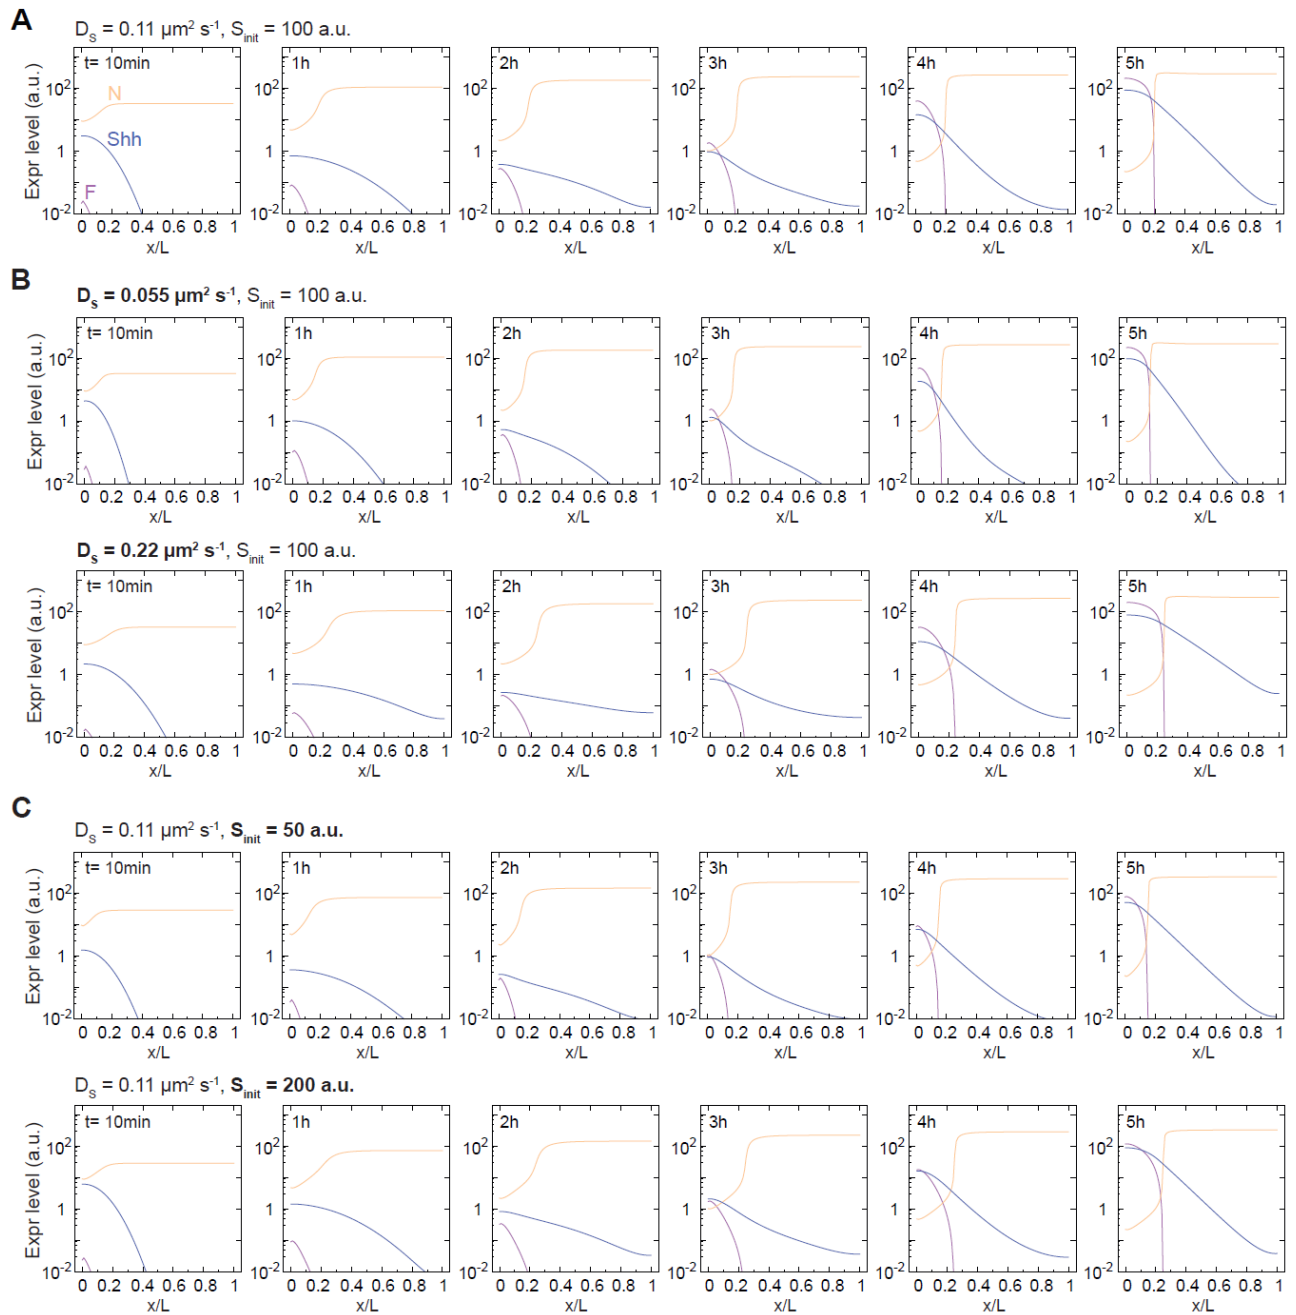

**Figure S5. Initial dynamics of the Shh gradient and FP formation.** **A.** Temporal dynamics of Shh and gene expression profiles at early times, prior to 5h. Floor plate F (purple), neural progenitor domains N (yellow), Shh (blue). The default parameters are used with  $D_S = 0.11 \mu\text{m}^2 \text{s}^{-1}$  and initial burst condition  $S_{init} = 100 \text{ a.u.}$  **B.** Same as A, but with a two-fold reduction (top row) or increase (bottom row) of the diffusion coefficient. **C.** Same as B, but with a two-fold reduction (top row) or increase (bottom row) of  $S_{init}$ . In A-C the same parameter set was used except for the indicated changes.
