# Supplementary material for: Dynamics of morphogen source formation in a growing tissue
Source: PubMed Central journal article supplement (PMC11501038; doi:10.1371/journal.pcbi.1012508), 2024-10-14
Supplement: pcbi.1012508.s006.pdf [file pcbi.1012508.s006.pdf]

**Figure S6**

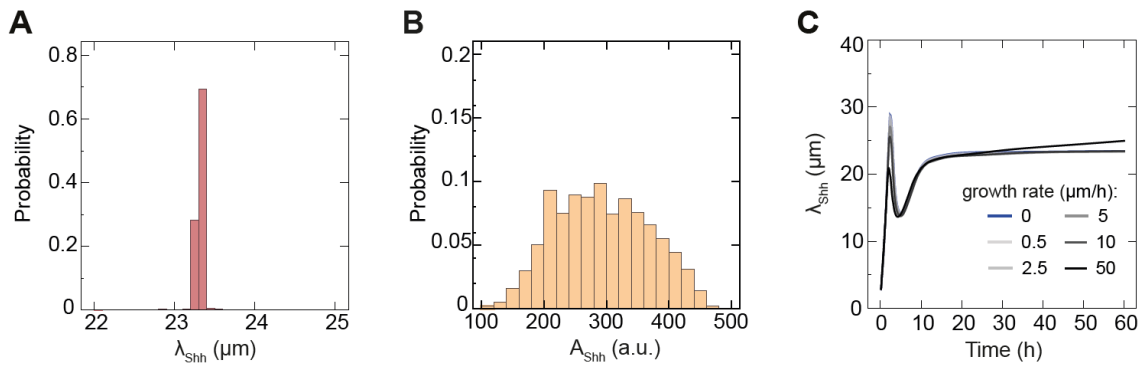

**Figure S6. Shh decay length and amplitude in the computational screen.** **A.** Probability distribution of Shh decay lengths in successful solutions of the computational screen. **B.** Probability distribution of Shh amplitudes. A, B,  $n = 169\,979$ . **C.** Shh decay length for  $\text{Shh}^{\text{FP}}$ -insensitive solutions as a function of time for different growth rates from  $k_p = 0 \mu\text{m/h}$  to  $50 \mu\text{m/h}$  (color coded as in the legend). The Shh decay length deviates from the value predicted by  $\lambda_{Shh} = \sqrt{D_S/\gamma_S} = 23.5 \mu\text{m}$  only for extremely fast growth. Sample size,  $n = 10$  per condition, sampled every 10 min.
