# Supplementary material for: Dynamics of morphogen source formation in a growing tissue
Source: PubMed Central journal article supplement (PMC11501038; doi:10.1371/journal.pcbi.1012508), 2024-10-14
Supplement: pcbi.1012508.s007.pdf [file pcbi.1012508.s007.pdf]

**Figure S7**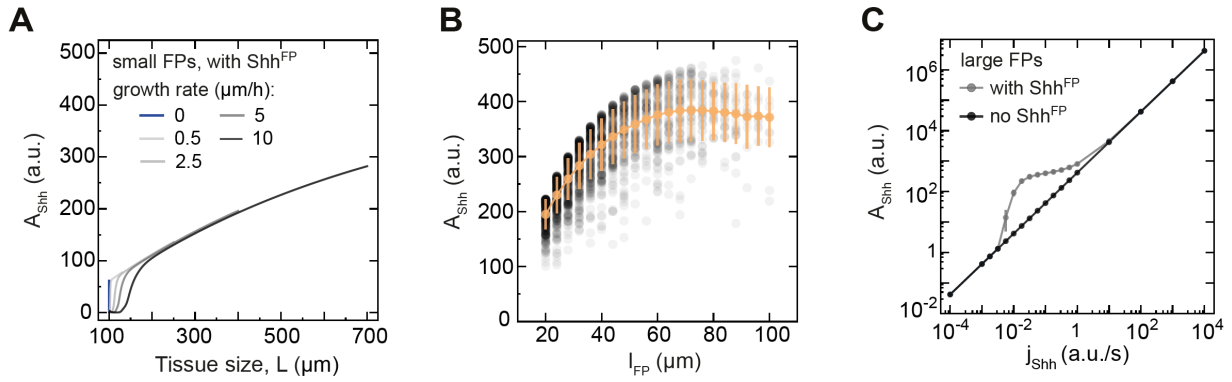

**Figure S7. The Shh amplitude depends on the tissue size and Shh flux.** **A.** Shh amplitude as a function of tissue size for insensitive solutions with Shh<sup>FP</sup> resulting in small FPs ( $l_{FP}/L_{end} = 5\%$ ). Growth rates from  $k_p = 0$   $\mu\text{m}/\text{h}$  to 10  $\mu\text{m}/\text{h}$  are color-coded,  $n = 10$  per condition, sampled every 10 min. **B.** Shh amplitude as a function of FP size throughout time. The yellow points correspond to mean  $A_{Shh}$  for a given  $l_{FP}$ , the number of samples per point from  $n = 23$  ( $l_{FP} = 20$   $\mu\text{m}$ ) to  $n = 497$  ( $l_{FP} = 100$   $\mu\text{m}$ ), error bars SE. Randomly selected points from successful solutions (black),  $n = 3000$ . **C.** Shh amplitude for large FP ( $l_{FP}/L_{end} = 20\%$ ) solutions with varied flux of Shh and no initial pulse of Shh. Without Shh<sup>FP</sup> (black), the  $A_{Shh}$  increases linearly with  $j_{Shh}$ . In solutions with Shh<sup>FP</sup> present (grey), the amplitude is increased in the range of  $\sim 0.01 \leq j_{Shh} \leq \sim 1$  a.u./s. The datapoints for the condition with Shh<sup>FP</sup> are the same as in Fig 6D (flux present condition). Sample size,  $n = 10$  per condition, error bars SEM. For the condition with no Shh<sup>FP</sup>, the sampled points are identical for a given flux.
